# Supplementary material
Source: PubMed Central journal article supplement (PMC2628201)

**Supplemental Data For:**

**Role of Cyclin D1 as a mediator of c-Met and  $\beta$ -Catenin induced  
hepatocarcinogenesis**

Mohini A. Patil<sup>1,2</sup>, Susie A. Lee<sup>1</sup>, Everardo Macias<sup>4</sup>, Ernest Lam<sup>1</sup>, Chuanrui Xu<sup>1,5</sup>,  
Kirk D. Jones<sup>3</sup>, Coral Ho<sup>1</sup>, Marcelo Rodriguez-Puebla<sup>4</sup> and Xin Chen<sup>1,2</sup>

Supplemental Figure 1:

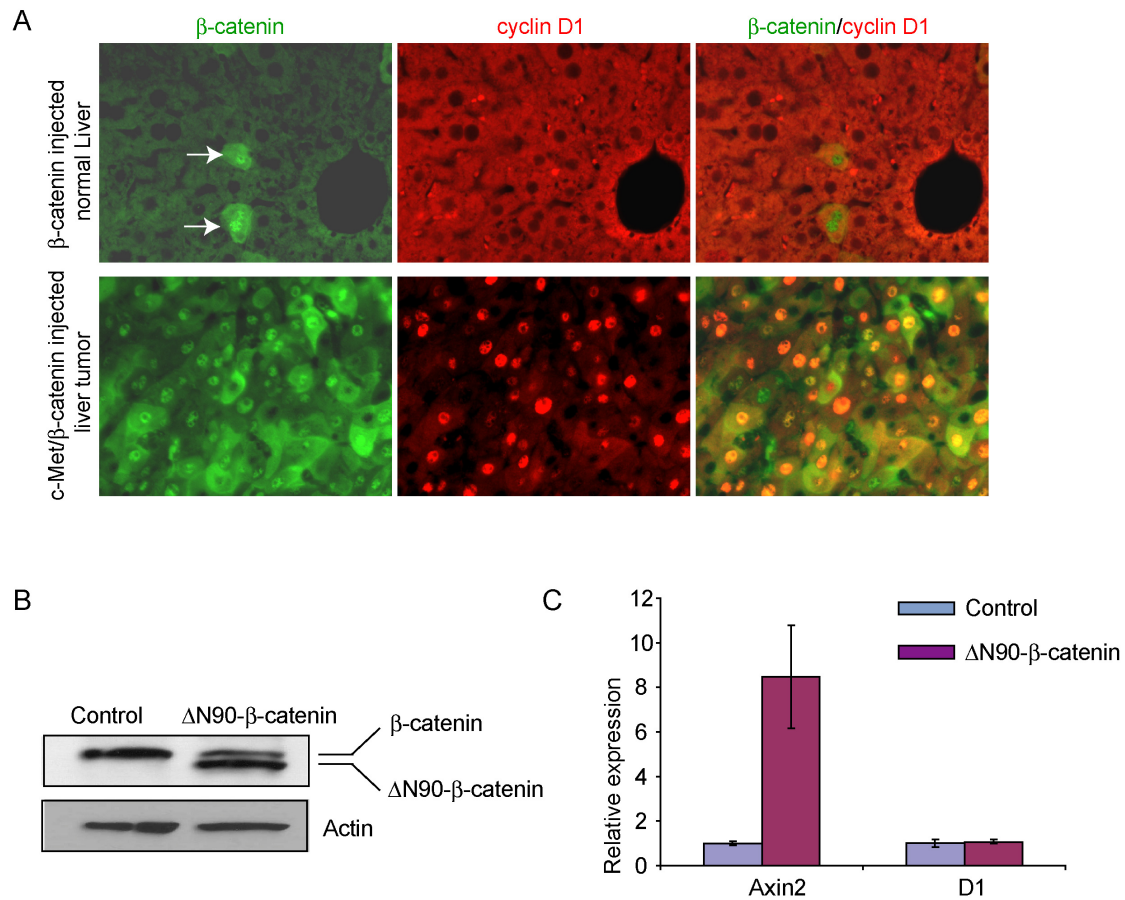

**Supplemental Figure One:** Cyclin D1 is not a direct target of activated  $\beta$ -catenin in normal hepatocytes. (A) Immunofluorescent staining of  $\beta$ -catenin (green) and CCND1(red) in normal liver injected with  $\Delta$ N90- $\beta$ -catenin (upper row), and in liver tumor induced by c-Met and  $\beta$ -catenin (lower row). White arrows indicate  $\Delta$ N90- $\beta$ -catenin stably expressed cells in normal liver; (B) Western blotting showing the expression of a truncated and activated form of  $\beta$ -catenin after transfection of primary mouse hepatocytes with  $\Delta$ N90- $\beta$ -catenin; (C) Real-time RT-PCR analysis of Axin2 and CCND1 expression in control and  $\Delta$ N90- $\beta$ -catenin transfected primary mouse hepatocytes.

Supplemental Figure 2:

| Injection                                  | Mouse strain   | Liver tumor images                                                                  |
|--------------------------------------------|----------------|-------------------------------------------------------------------------------------|
| c-Met plus CCND1                           | Wildtype FVB/N |   |
| c-Met plus $\Delta$ -N90- $\beta$ -catenin | Wildtype FVB/N |   |
| c-Met plus $\Delta$ -N90- $\beta$ -catenin | D1-/- FVB/N    |  |

**Supplemental Figure Two:** Gross images of liver tumors.

Supplemental Figure 3:

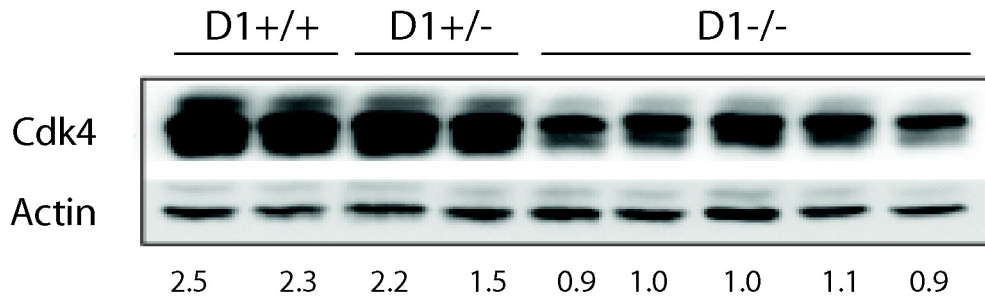

**Supplemental Figure Three:** Decreased expression of Cdk4 in liver tumors induced by c-Met and  $\beta$ -catenin from mice with different CCND1 genetic backgrounds. Five more tumors samples from CCND1 null mice are shown here in addition to what is shown in Figure 6A; and the numbers at the bottom of the figure are relative ratio of Cdk4 expression after normalization.

Supplemental Figure 4: Array CGH plots of tumors induced by c-Met and beta-catenin in wild-type mice and CCND1 null mice

c-Met/b-catenin HCC 1

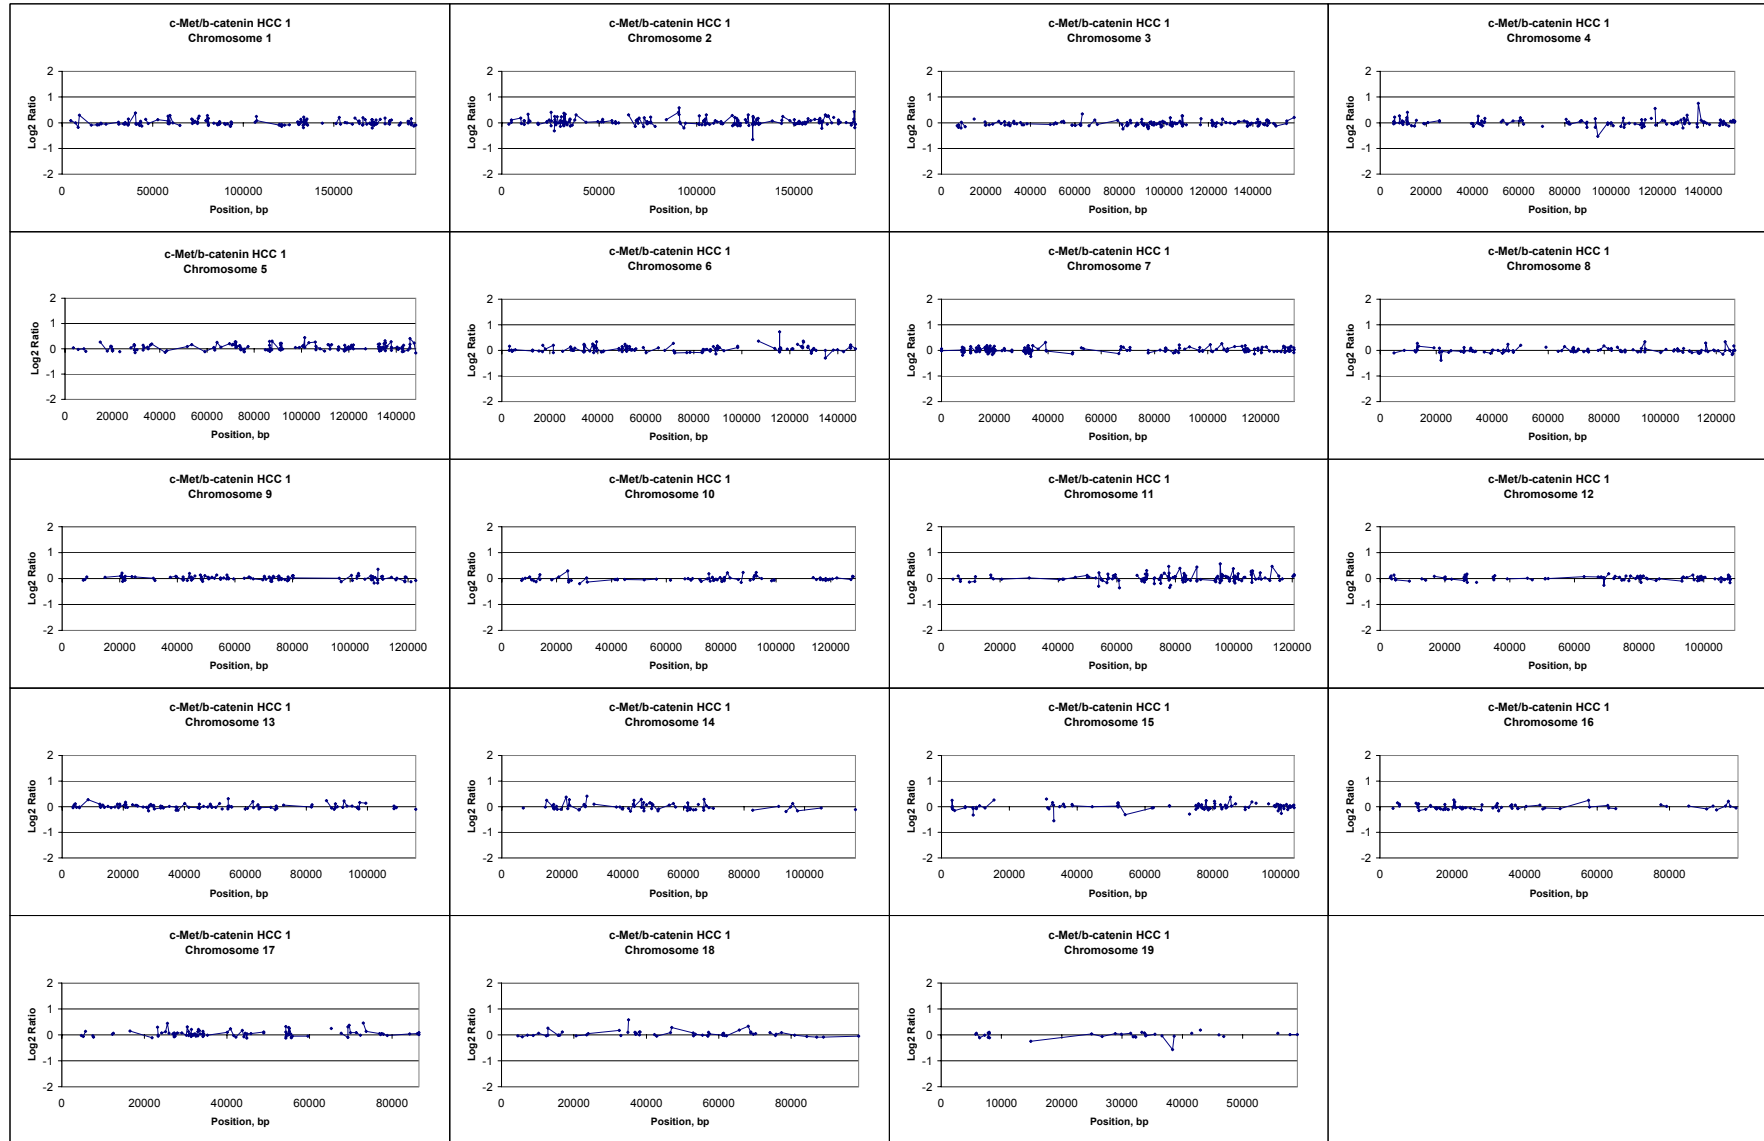

c-Met/b-catenin HCC 2

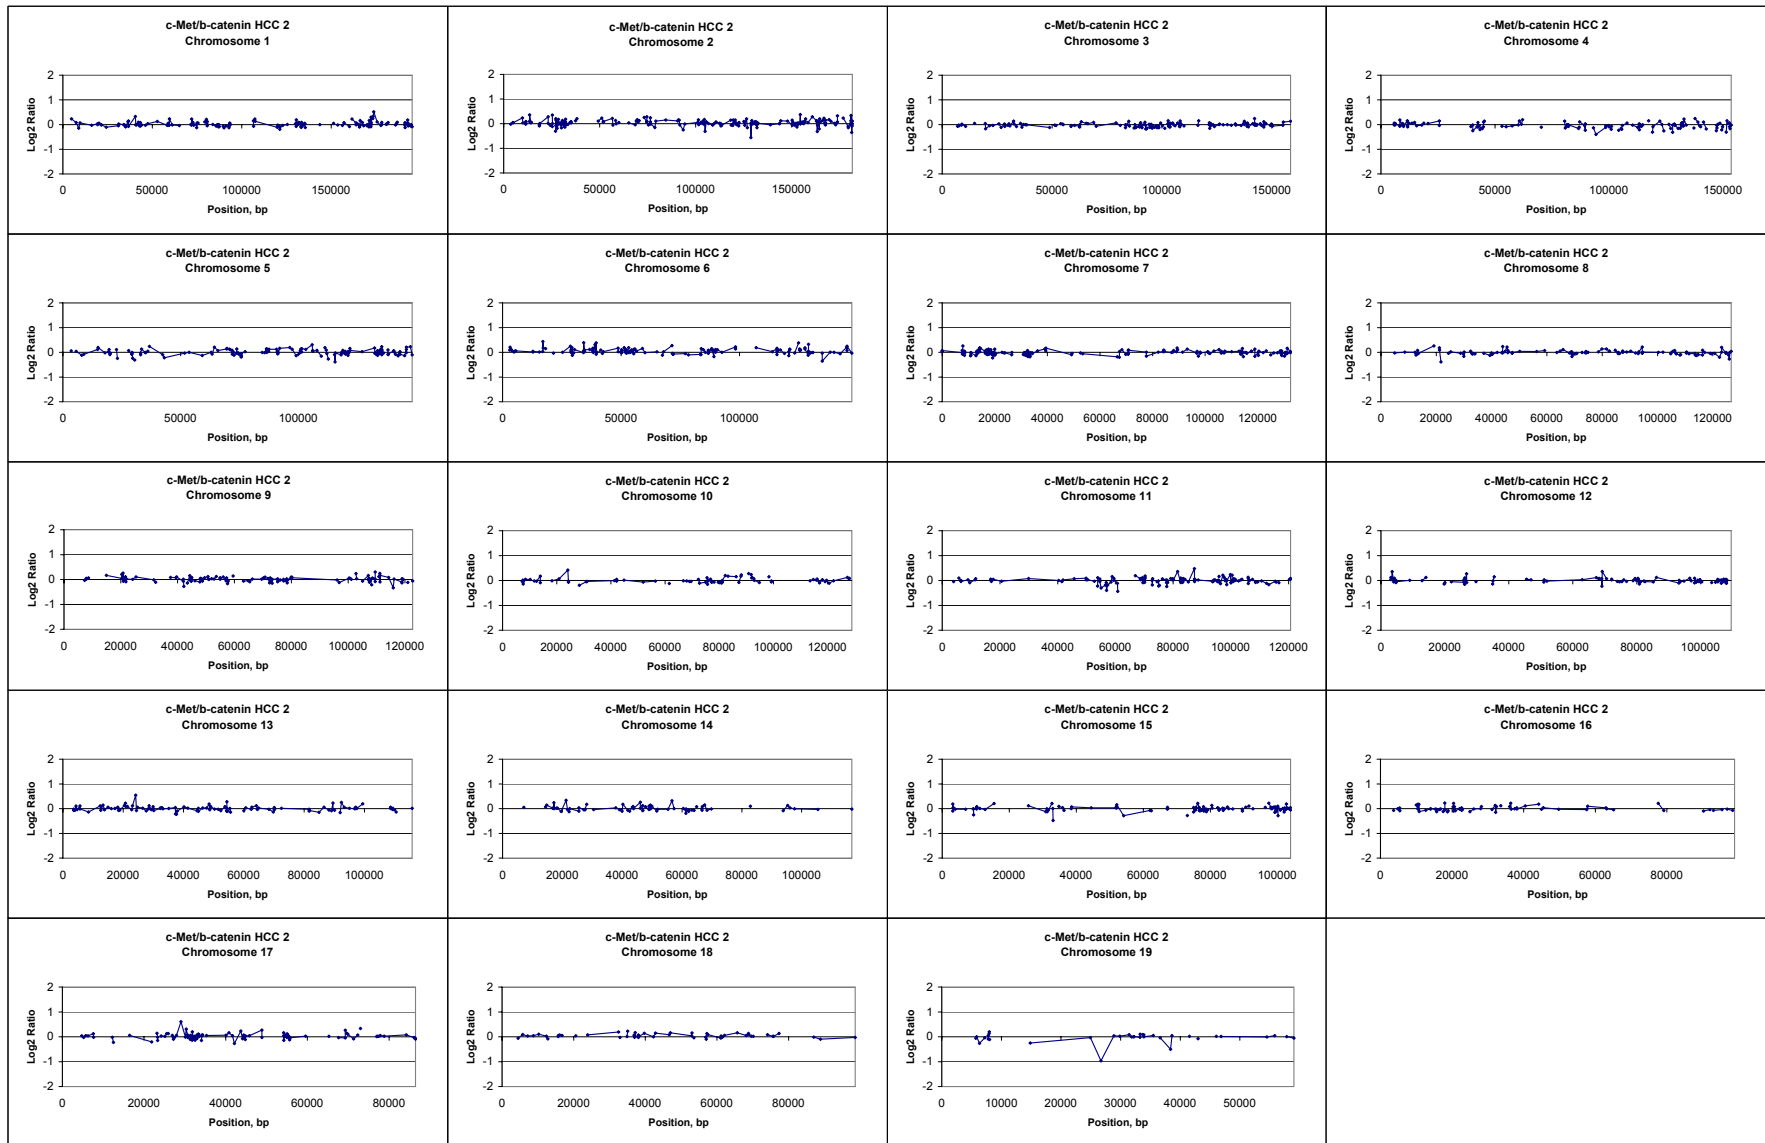

c-Met/b-catenin D1-/- HCC 2

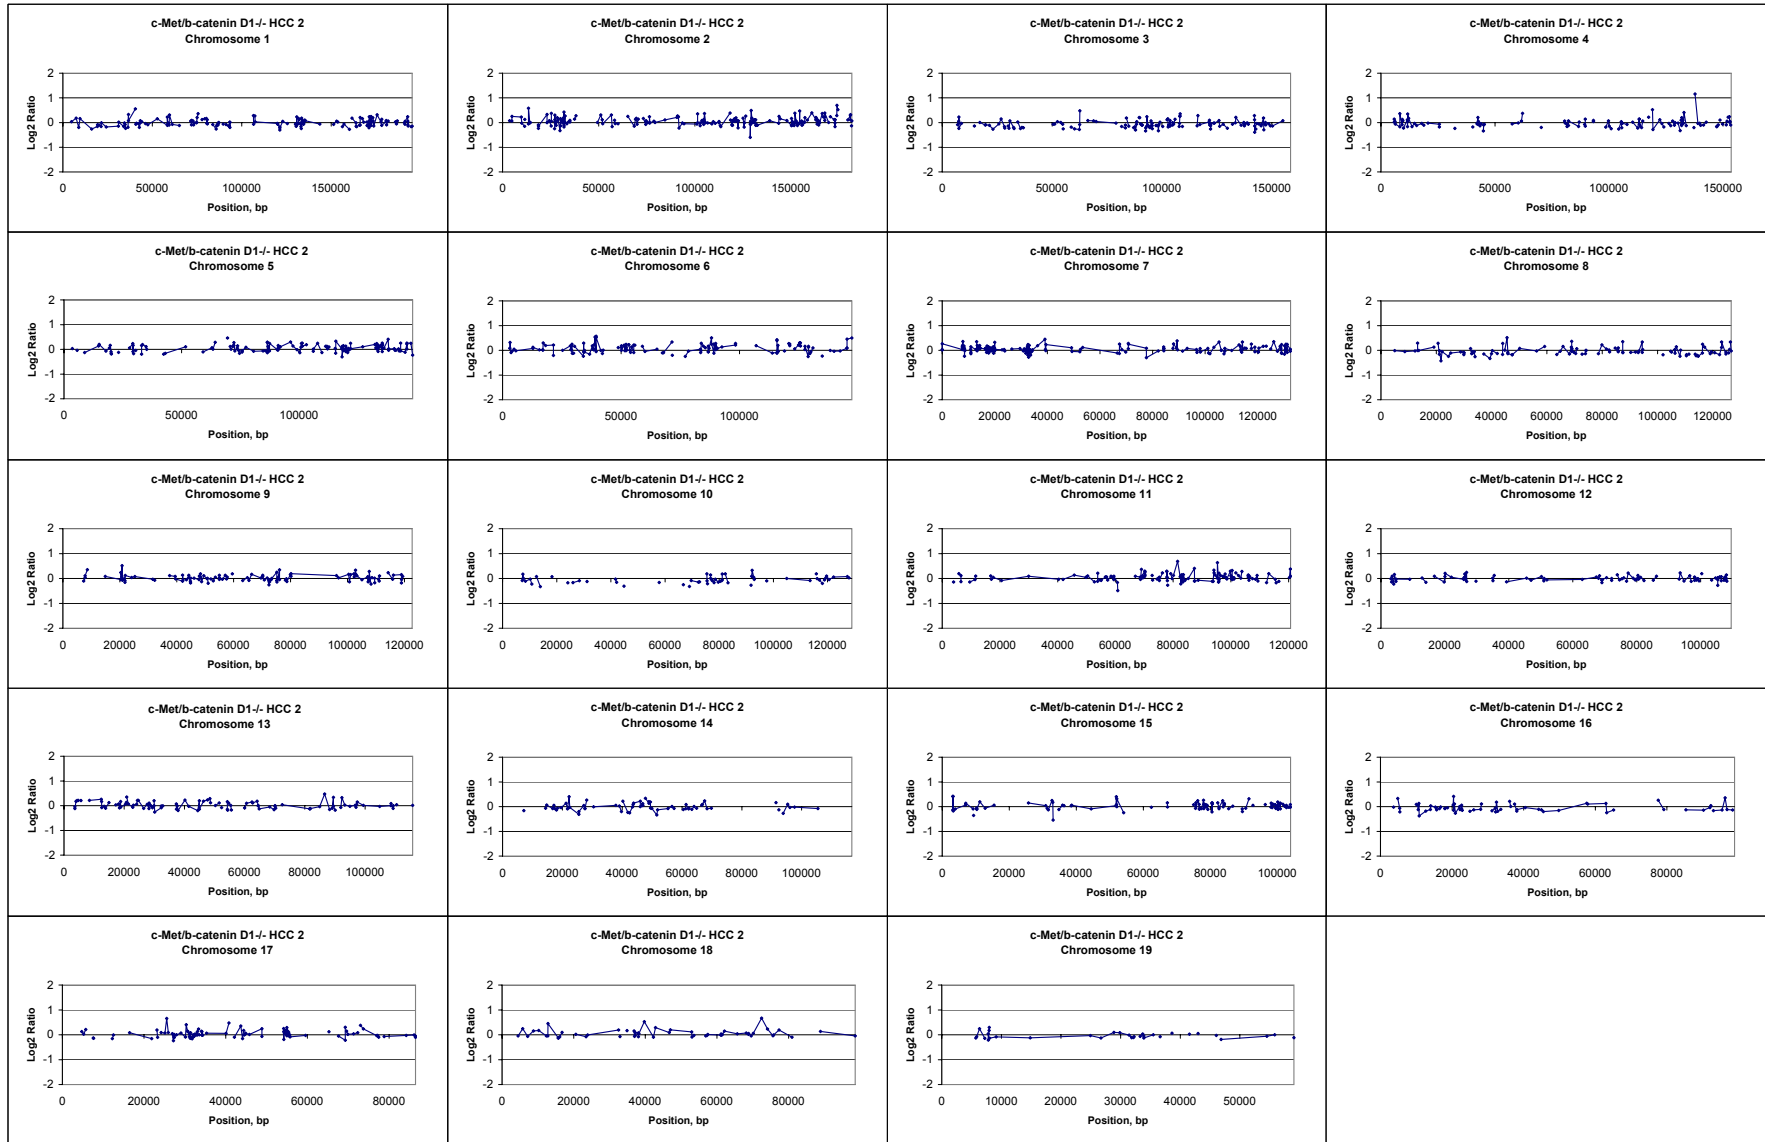

c-Met/b-catenin D1-/- HCC 1

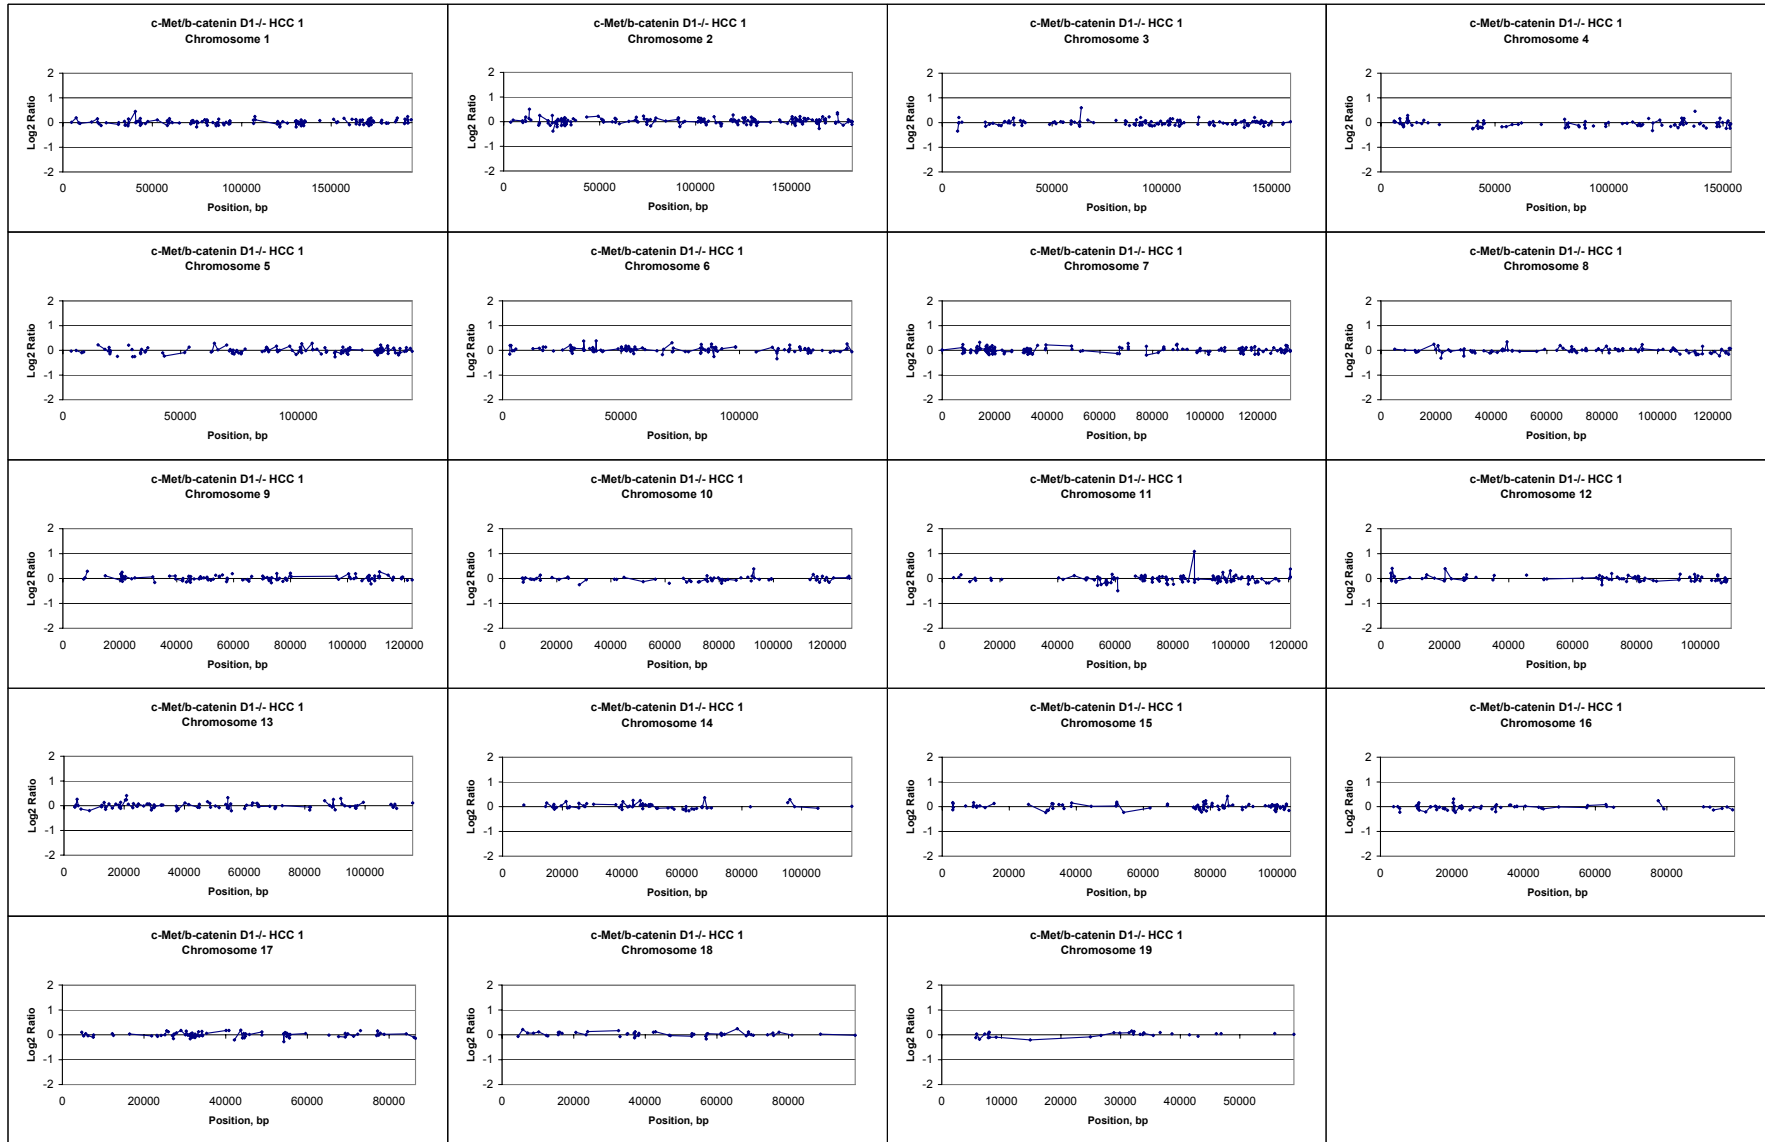

Supplement: NIHMS81302-supplement-Supplementary.pdf [file NIHMS81302-supplement-Supplementary.pdf]
